# Supplementary material for: A forensic re-analysis of one of the deadliest European tornadoes
Source: Copernicus journal article supplement (doi:10.5194/nhess-18-1555-2018), 2018-06-04
Supplement: Supplementary file 1 [file nhess-18-1555-2018-supplement.zip]

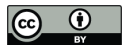

## *Supplement of*

# **A forensic re-analysis of one of the deadliest European tornadoes**

**Alois M. Holzer et al.**

*Correspondence to:* Alois M. Holzer ([alois.holzer@essl.org](mailto:alois.holzer@essl.org))

- [nhess-18-1555-2018-supplement-title-page.pdf](#)
- [Photo Analysis TORNeustadt\\_final.csv](#)

The copyright of individual parts of the supplement might differ from the CC BY 4.0 License.
